# Supplementary material
Source: PubMed Central journal article supplement (PMC6964307)
Supplement: ao9b03246_si_001.pdf [file ao9b03246_si_001.pdf]

Supplementary information for

**Solid-state chemiresistors from two-dimensional MoS<sub>2</sub> nanosheets functionalized with L-cysteine for in-line sensing of part-per-billion Cd<sup>2+</sup> ions in drinking water**

Paul Bazylewski,<sup>a,b</sup> Sheldon Van Middelkoop,<sup>a</sup> Ranjith Divigalpitiya,<sup>b</sup> and Giovanni Fanchini<sup>a,c</sup>

<sup>a</sup> *Department of Physics and Astronomy, University of Western Ontario, 1151 Richmond St., London, ON N6A 3K7, Canada*

<sup>b</sup> *3M Canada Company, 1840 Oxford St., London ON N5V 3R6, Canada*

<sup>c</sup> *Department of Chemistry, University of Western Ontario, 1151 Richmond St., London, ON N6A 5B7, Canada*

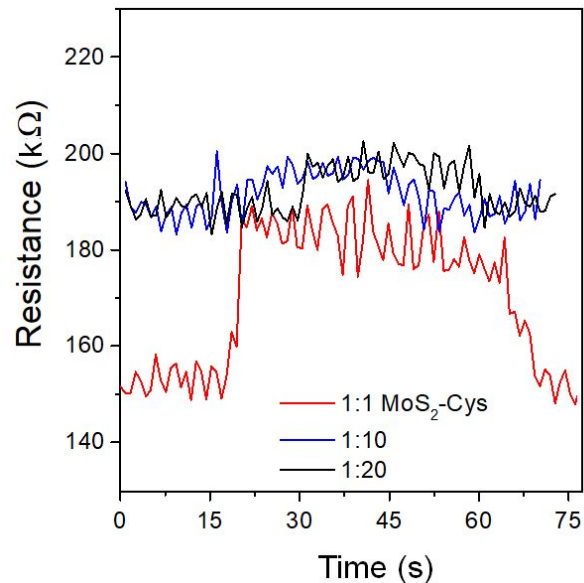

**Figure S1.** Comparison of MoS<sub>2</sub>-Cys baseline resistances depending on the degree of cysteine functionalization. Baseline resistance is shown to increase significantly when cysteine concentrations greater than 1:1 mass ratio are used.

**Table S1.** Dry resistances inferred from baseline values in Figure 1S.

| MoS <sub>2</sub> -Cys Sensor | Dry Resistance (kΩ ±10%) |
|------------------------------|--------------------------|
| 1:1                          | 150                      |
| 1:10                         | 188                      |
| 1:20                         | 184                      |

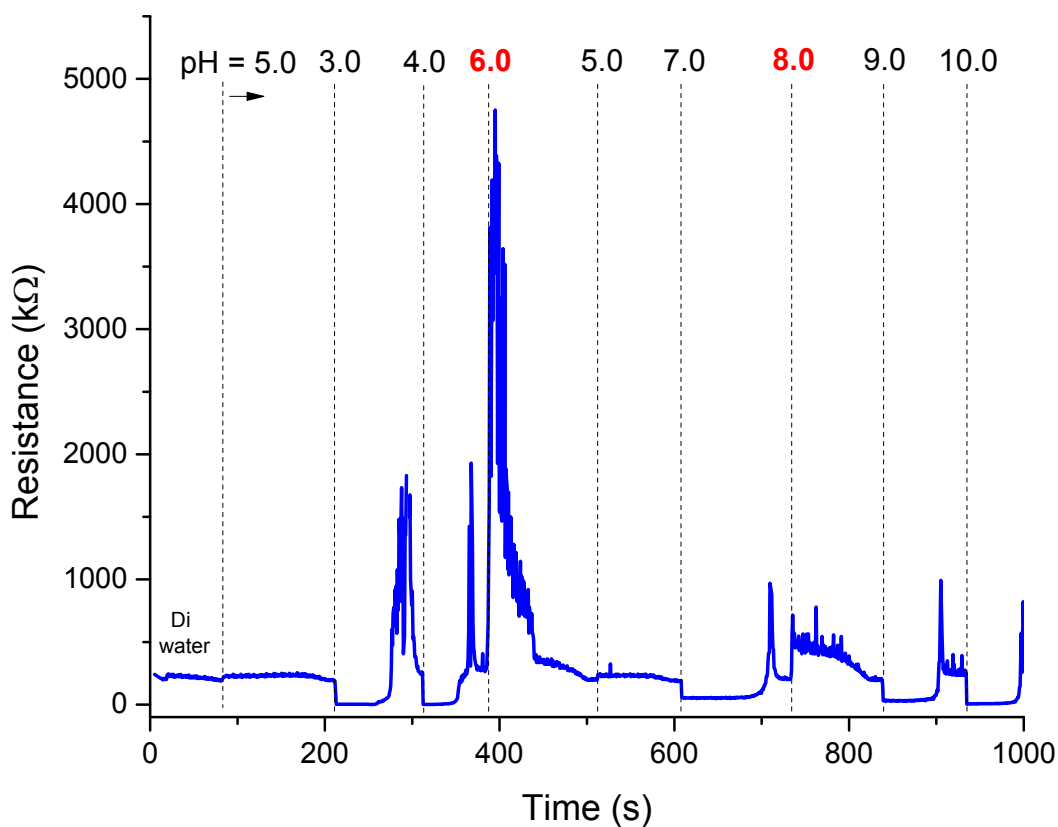

**Figure S2.** Sensing measurements for MoS<sub>2</sub>-Cys 1:20 chemiresistor challenged with 10 ppb CdCl<sub>2</sub> solution at varied pH values. The dotted lines mark when the metal ion solution was added at the stated pH. Large increases in resistance seen after a solution has passed for example at approximately 300, 380, 710 and 910 seconds, are due to washing with deionized water.
